# Supplementary material for: A Modified R-Type Bacteriocin Specifically Targeting Clostridium difficile Prevents Colonization of Mice without Affecting Gut Microbiota Diversity
Source: PubMed Central journal article supplement (PMC4453579; doi:10.1128/mbio.02368-14), 2015-03-24

Fig. S5

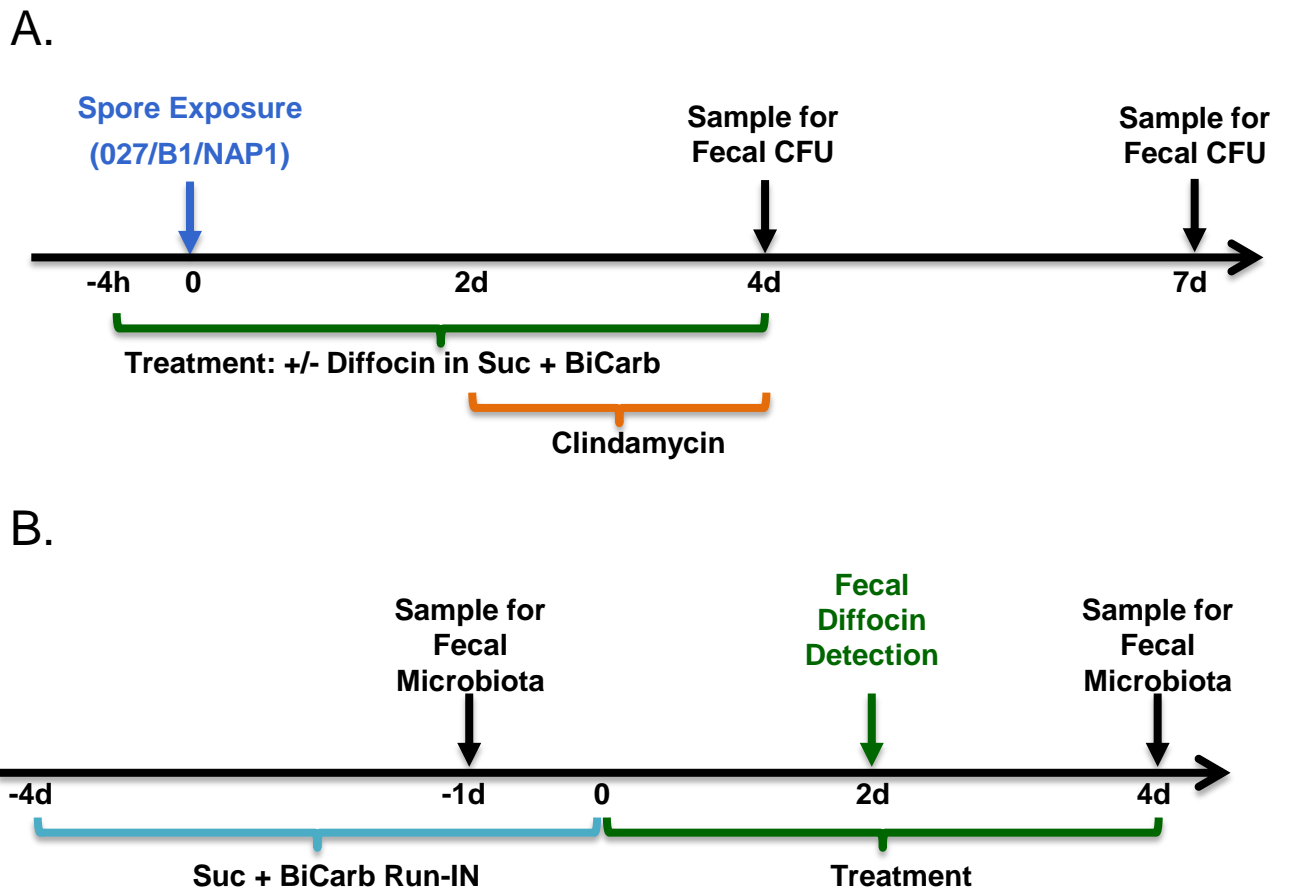

Supplement: mbo002152236sf5.pdf [file mbo002152236sf5.pdf]
