# Supplementary material for: A Modified R-Type Bacteriocin Specifically Targeting Clostridium difficile Prevents Colonization of Mice without Affecting Gut Microbiota Diversity
Source: PubMed Central journal article supplement (PMC4453579; doi:10.1128/mbio.02368-14), 2015-03-24
Supplement: mbo002152236st1.pdf [file mbo002152236st1.pdf]

**Table S1.** Summary of p-value results for Adonis tests. Adonis tests were performed on pair-wise comparisons between treatment cohorts.

|                              |                                         |                                  | Adonis Test<br>(p-value) |              |
|------------------------------|-----------------------------------------|----------------------------------|--------------------------|--------------|
|                              |                                         |                                  | Abundance                | Incidence    |
| <b>Pair-Wise Comparisons</b> | <i>Av-CD291.2<br/>Pre-Treatment</i>     | Av-CD291.2<br>Post-Treatment     | 0.136                    | 0.48         |
|                              | <i>Placebo<br/>Pre-Treatment</i>        | Placebo<br>Post-Treatment        | 0.303                    | 0.097        |
|                              | <i>LD-Fidaxomicin<br/>Pre-Treatment</i> | LD-Fidaxomicin<br>Post-Treatment | <b>0.02</b>              | <b>0.001</b> |
|                              | Placebo<br>Post-Treatment               | Av-CD291.2<br>Post-Treatment     | 0.229                    | 0.107        |
|                              | Av-CD291.2<br>Post-Treatment            | LD-Fidaxomicin<br>Post-Treatment | <b>0.005</b>             | <b>0.001</b> |
|                              | LD-Fidaxomicin<br>Post-Treatment        | Placebo<br>Post-Treatment        | <b>0.042</b>             | <b>0.003</b> |

The p-values < 0.05 are highlighted in **red**.
