# Supplementary material for: A Modified R-Type Bacteriocin Specifically Targeting Clostridium difficile Prevents Colonization of Mice without Affecting Gut Microbiota Diversity
Source: PubMed Central journal article supplement (PMC4453579; doi:10.1128/mbio.02368-14), 2015-03-24
Supplement: mbo002152236st2.pdf [file mbo002152236st2.pdf]

**Table S2. Strain List.**

| Species                      | Strain Designation | Ribo-type | Source                      | Comment – Isolation - Reference                        |
|------------------------------|--------------------|-----------|-----------------------------|--------------------------------------------------------|
| <i>Bacillus subtilis</i>     | BDR11              |           | David Rudner                | Parent of <i>B. subtilis</i> strains                   |
| <i>Bacillus subtilis</i>     | BDG9               |           | Gebhart, <i>et al.</i> 2012 | ΔPBSX                                                  |
| <i>Bacillus subtilis</i>     | BDG45              |           | Gebhart, <i>et al.</i> 2012 | Diffocin-4 producer                                    |
| <i>Bacillus subtilis</i>     | BDG59              |           | this paper                  | Diffocin-43593 producer                                |
| <i>Bacillus subtilis</i>     | BDG77              |           | this paper                  | ΔPBSX, ΔSpolIGA                                        |
| <i>Bacillus subtilis</i>     | BDG127             |           | this paper                  | Av-CD291.1 producer                                    |
| <i>Bacillus subtilis</i>     | BDG189             |           | this paper                  | Av-CD291.2 producer                                    |
| <i>Clostridium difficile</i> | 19103              | 001       | R.M. Alden Research         | N. America/2006-8 / Louie <i>et al.</i> , 2011         |
| <i>Clostridium difficile</i> | 19135              | 001       | R.M. Alden Research         | N. America / 2006-8 / Louie <i>et al.</i> , 2011       |
| <i>Clostridium difficile</i> | BI-9               | 001       | Trevor Lawley               | Gerding Collection / He <i>et al.</i> , 2010           |
| <i>Clostridium difficile</i> | Liv24              | 001       | Trevor Lawley               | Liverpool UK / 2009                                    |
| <i>Clostridium difficile</i> | 19137              | 015       | R.M. Alden Research         | N. America / 2006-8 / Louie <i>et al.</i> , 2011       |
| <i>Clostridium difficile</i> | TL174              | 015       | Trevor Lawley               | Cambridge UK / 2004                                    |
| <i>Clostridium difficile</i> | CF5                | 017       | Trevor Lawley               | Belgium /1995 / He <i>et al.</i> , 2010                |
| <i>Clostridium difficile</i> | M68                | 017       | Trevor Lawley               | Ireland / 2006 / He <i>et al.</i> , 2010               |
| <i>Clostridium difficile</i> | 19104              | 027       | R.M. Alden Research         | N. America / 2006-8 / Louie <i>et al.</i> , 2011       |
| <i>Clostridium difficile</i> | 19113              | 027       | R.M. Alden Research         | N. America / 2006-8 / Louie <i>et al.</i> , 2011       |
| <i>Clostridium difficile</i> | 19124              | 027       | R.M. Alden Research         | N. America / 2006-8 / Louie <i>et al.</i> , 2011       |
| <i>Clostridium difficile</i> | 19126              | 027       | R.M. Alden Research         | N. America / 2006-8 / Louie <i>et al.</i> , 2011       |
| <i>Clostridium difficile</i> | 19129              | 027       | R.M. Alden Research         | N. America / 2006-8 / Louie <i>et al.</i> , 2011       |
| <i>Clostridium difficile</i> | 19136              | 027       | R.M. Alden Research         | N. America / 2006-8 / Louie <i>et al.</i> , 2011       |
| <i>Clostridium difficile</i> | 19138              | 027       | R.M. Alden Research         | N. America / 2006-8 / Louie <i>et al.</i> , 2011       |
| <i>Clostridium difficile</i> | 19139              | 027       | R.M. Alden Research         | N. America / 2006-8 / Louie <i>et al.</i> , 2011       |
| <i>Clostridium difficile</i> | 19143              | 027       | R.M. Alden Research         | N. America / 2006-8 / Louie <i>et al.</i> , 2011       |
| <i>Clostridium difficile</i> | 19153              | 027       | R.M. Alden Research         | N. America / 2006-8 / Louie <i>et al.</i> , 2011       |
| <i>Clostridium difficile</i> | 19684              | 027       | R.M. Alden Research         | N. America / 2006-8 / Louie <i>et al.</i> , 2011       |
| <i>Clostridium difficile</i> | 20068              | 027       | R.M. Alden Research         | N. America / 2006-8 / Louie <i>et al.</i> , 2011       |
| <i>Clostridium difficile</i> | BI-7               | 027       | Trevor Lawley               | Portland, OR / 2003 / He <i>et al.</i> , 2010          |
| <i>Clostridium difficile</i> | CD196              | 027       | Trevor Lawley               | Paris, Fr /1985 / He <i>et al.</i> , 2010              |
| <i>Clostridium difficile</i> | R20291             | 027       | Trevor Lawley               | Aylesbury, UK / 2006 / He <i>et al.</i> , 2010         |
| <i>Clostridium difficile</i> | VA17               | 027       | Curtis Donskey              | Cleveland, OH/ 2005 / Pultz <i>et al.</i> , 2005       |
| <i>Clostridium difficile</i> | 19108              | 053       | R.M. Alden Research         | N. America / 2006-8 / Louie <i>et al.</i> , 2011       |
| <i>Clostridium difficile</i> | 19110              | 053       | R.M. Alden Research         | N. America / 2006-8 / Louie <i>et al.</i> , 2011       |
| <i>Clostridium difficile</i> | 19147              | 053       | R.M. Alden Research         | N. America / 2006-8 / Louie <i>et al.</i> , 2011       |
| <i>Clostridium difficile</i> | ATCC 43255         | 087       | ATCC                        | Toxinotype 0 ref strain / Hammond <i>et al.</i> , 1995 |
| <i>Clostridium difficile</i> | ATCC 43593         | 060       | ATCC                        | Belgium / 1984 / Delmee <i>et al.</i> , 1985           |
| <i>Enterococcus faecium</i>  | (VRE) C68          |           | Curtis Donskey              | Cleveland / 1996 / Donskey <i>et al.</i> , 1999        |
