# Supplementary material for: A Modified R-Type Bacteriocin Specifically Targeting Clostridium difficile Prevents Colonization of Mice without Affecting Gut Microbiota Diversity
Source: PubMed Central journal article supplement (PMC4453579; doi:10.1128/mbio.02368-14), 2015-03-24
Supplement: mbo002152236st3.pdf [file mbo002152236st3.pdf]

## Table S3.

### A. Oligonucleotide List

| Oligonucleotide Name | Sequence                                          |
|----------------------|---------------------------------------------------|
| AV1288               | Gaagaaagagatgggactcgagatg                         |
| AV1289               | tatacatctcgagtcccatctctttc                        |
| oDG15                | tcctcggcgcgcctcaaatttaagcttaactcc                 |
| oDG376               | ttcctcggccgcctgttaagccagttaaaattactac             |
| oDG392               | gattgcatgagtgagtag                                |
| oDG393               | ctactcactcgcgatgcaatc                             |
| oDG590               | ggcgctcaggatccggcgcgcctcaaatttaagctt              |
| oDG591               | tctggaaataatctagaactttcgaagatatctagaactttcaaagatg |
| oDG602               | gcttatttagcatctaaatctgaatatcctttgagttaca          |
| oDG603               | taactcaaaggatattcaagatttagatgctaaaataagca         |
| oDG604               | aattttcacacctccattttaataaaatttaatagcataccatt      |
| oDG605               | ggtatgctattaaattttaaataatggagggtgaaaattgt         |
| oDG785               | ggcgctcaggatccggcgcgcctatatagttggttctgctcc        |

### B. Plasmid List

| Plasmid Name | Source                      | Description                             |
|--------------|-----------------------------|-----------------------------------------|
| pDG636       | Gebhart, <i>et al.</i> 2012 | Construct for Diffocin -4 production    |
| pDG636       | this paper                  | Construct for Diffocin-43593 production |
| pDG721       | this paper                  | Construct for Av-CD291.1 production     |
| pDG779       | this paper                  | Construct for Av-CD291.2 production     |
